# Supplementary material
Source: bioRxiv or medRxiv preprint supplement (https://medrxiv.org/content/medrxiv/early/2024/11/12/2024.11.12.24317148/DC1/embed/media-1.pdf)
Supplement: Supplementary file [file media-1.pdf]

## Supplementary Figures

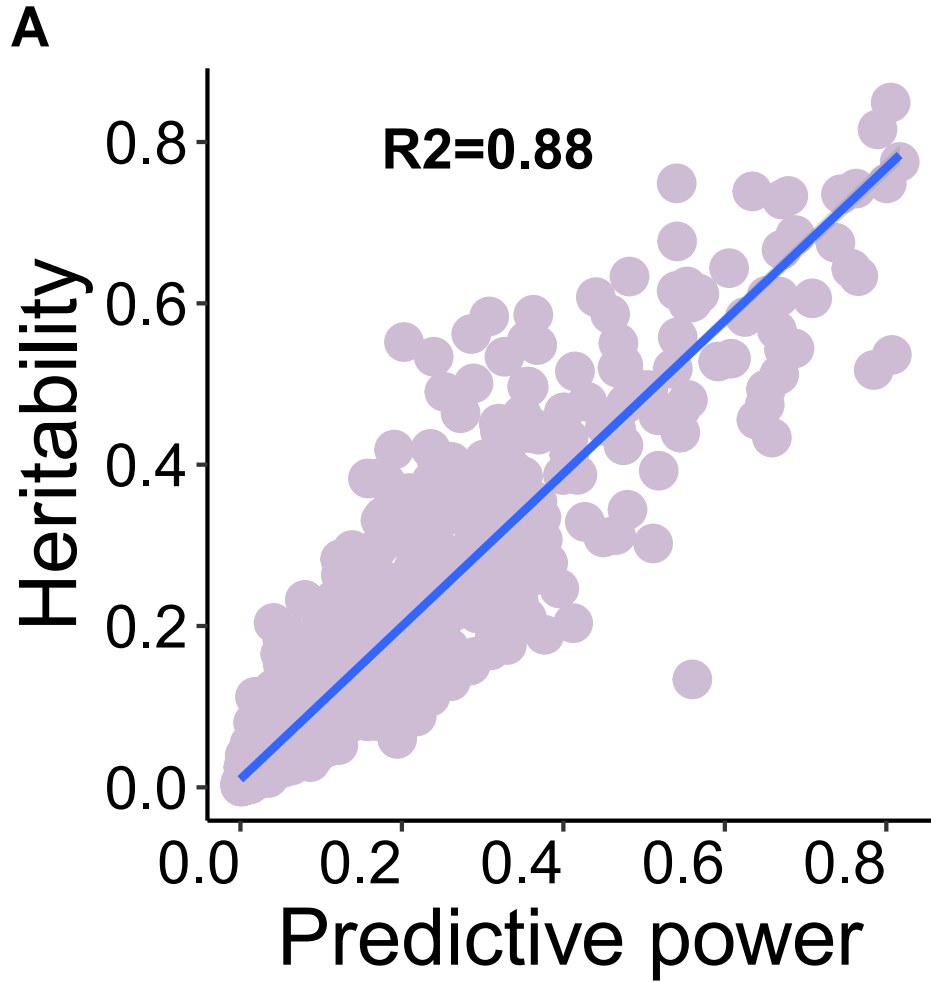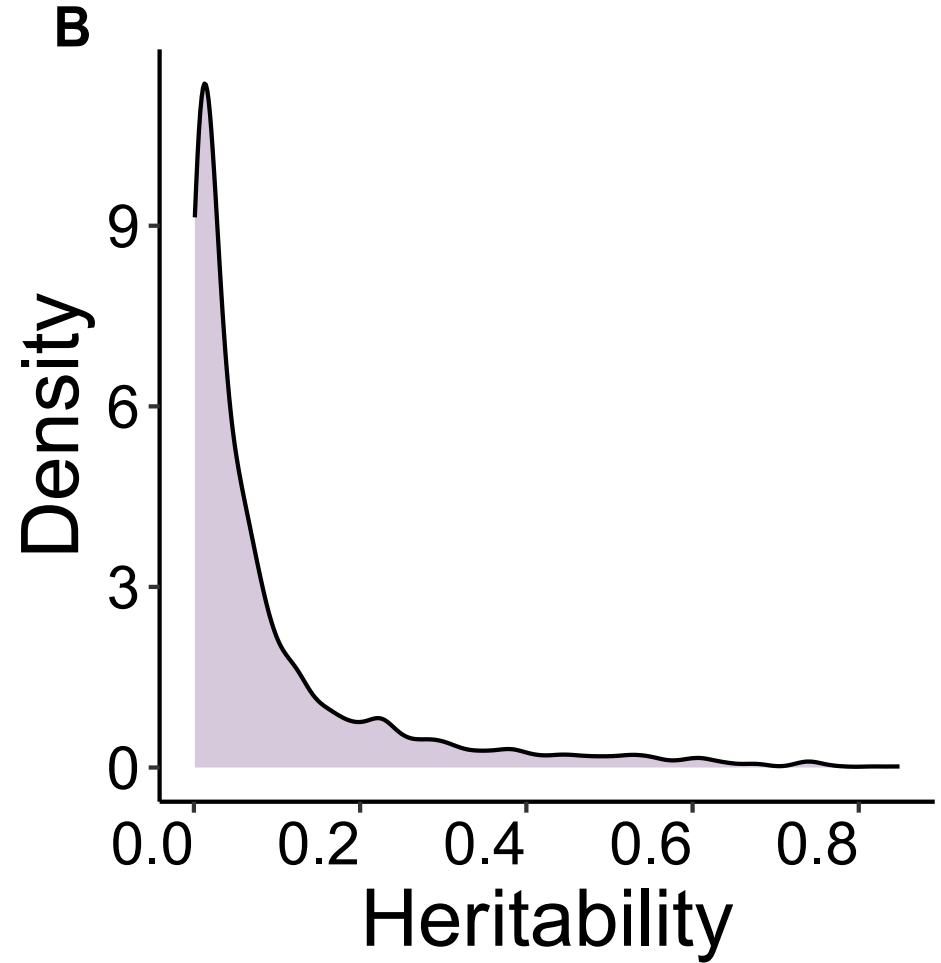

**Figure S1. A. Correlation between model prediction ability and protein model prediction ability. B. Density curve illustrating the distribution of protein heritability values.**

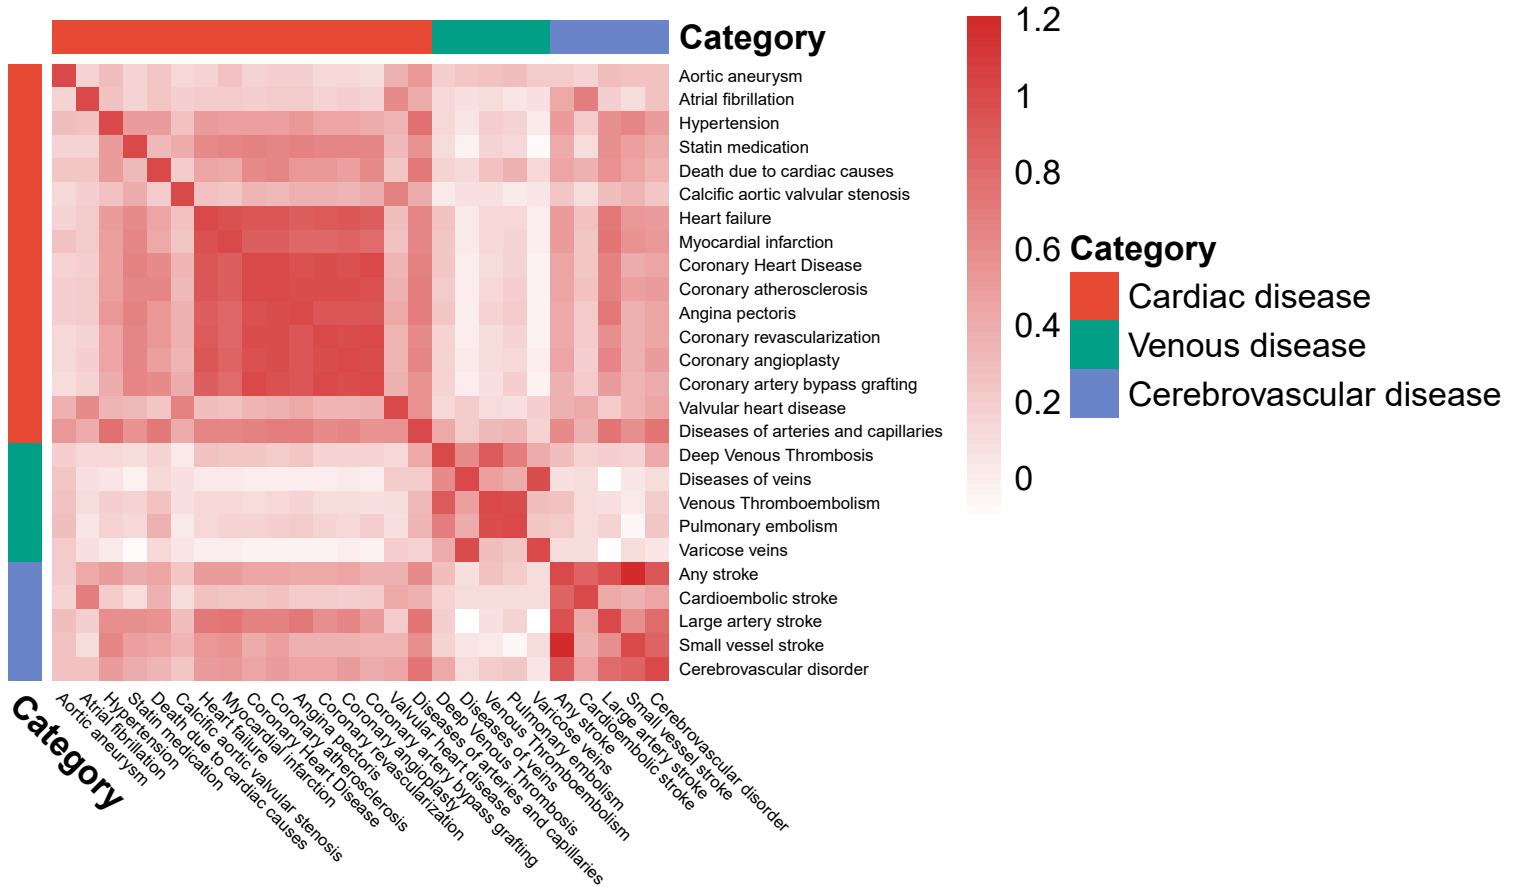

**Figure S2. Genetic correlation between 26 CVD.** Genetic correlation is estimated by LD score regression.

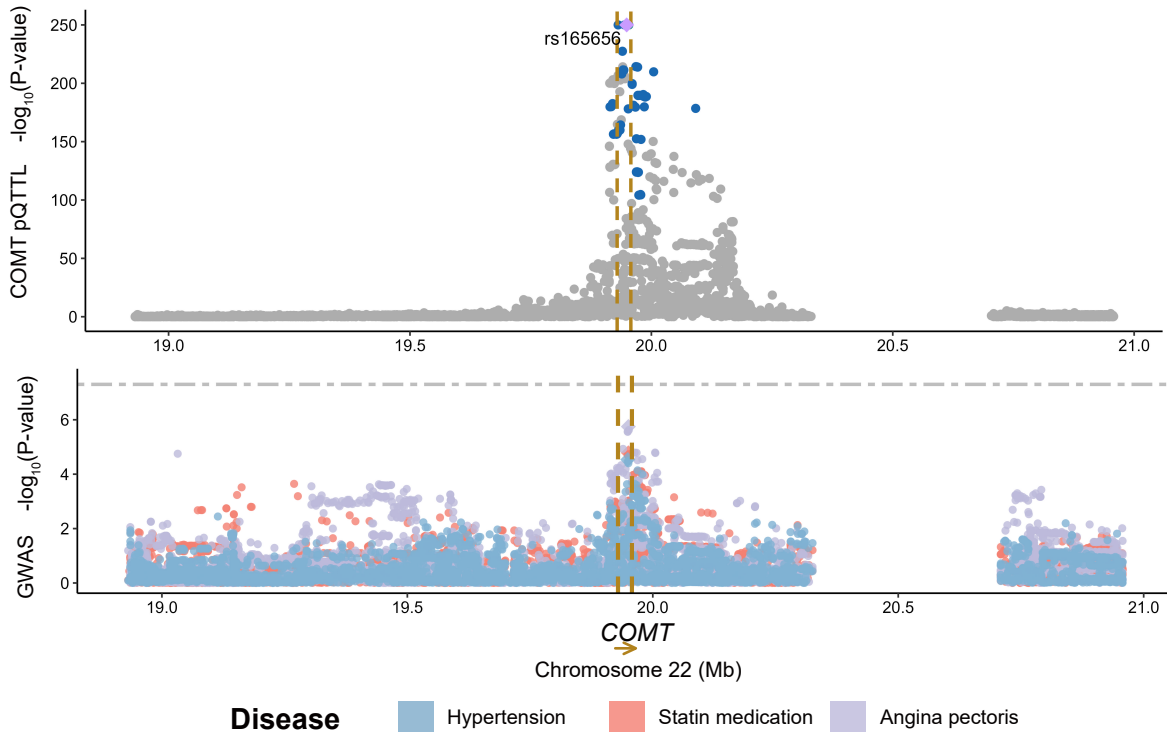

**Figure S3.** The top Manhattan plot represents the pQTL within the COMT genomic region and the bottom Manhattan represents the GWAS results for hypertension, statin medication and angina pectoris.
